# Supplementary material for: DNA replication machinery prevents Rad52-dependent single-strand annealing that leads to gross chromosomal rearrangements at centromeres
Source: PubMed Central journal article supplement (PMC7193609; doi:10.1038/s42003-020-0934-0), 2020-04-30
Supplement: 42003_2020_934_MOESM1_ESM.pdf [file 42003_2020_934_MOESM1_ESM.pdf]

## Supplementary Figures

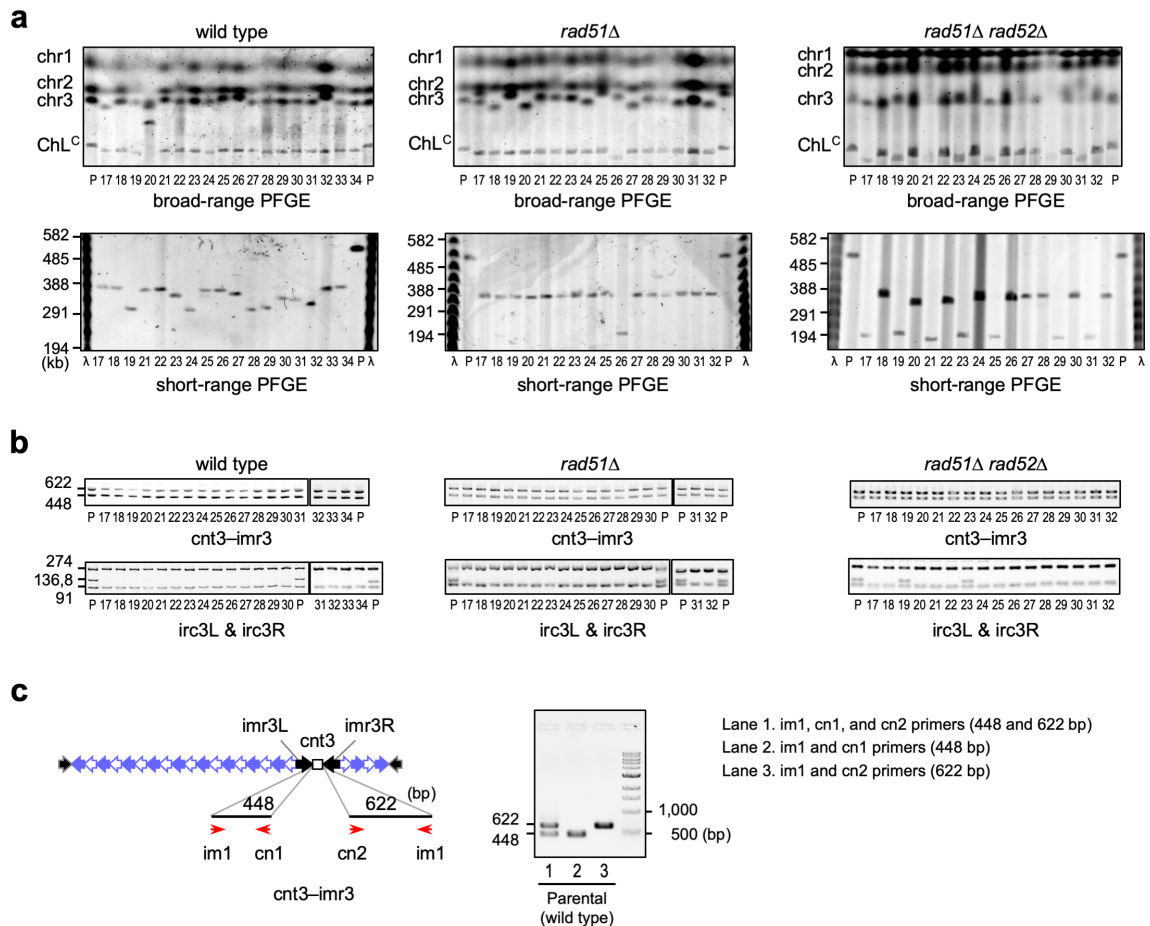

**Supplementary Fig. 1** GCR products formed in the wild-type, *rad51* $\Delta$ , and *rad51* $\Delta$  *rad52* $\Delta$  strains. **a** Chromosomal DNAs from parental and independent GCR clones of the wild-type, *rad51* $\Delta$ , and *rad51* $\Delta$  *rad52* $\Delta$  strains (TNF5369, 5411, and 7553, respectively) were separated by broad- and short-range PFGE and stained with EtBr. **b** PCR analysis of GCR products. Both sides of the *cnt3*–*imr3* junctions (*cnt3*–*imr3*) and outermost repeats (*irc3L* & *irc3R*) were examined. **c** Separate amplification of the left and right sides of the *cnt3*–*imr3* junctions. The parental ChL<sup>C</sup> of the wild-type strain was amplified using the indicated three different sets of primers. The lengths of DNA fragments in the 1 kb DNA Ladder (New England Biolabs, N3232S) are shown on the right of the image. Uncropped images of the gels presented here are shown in Supplementary Fig. 10

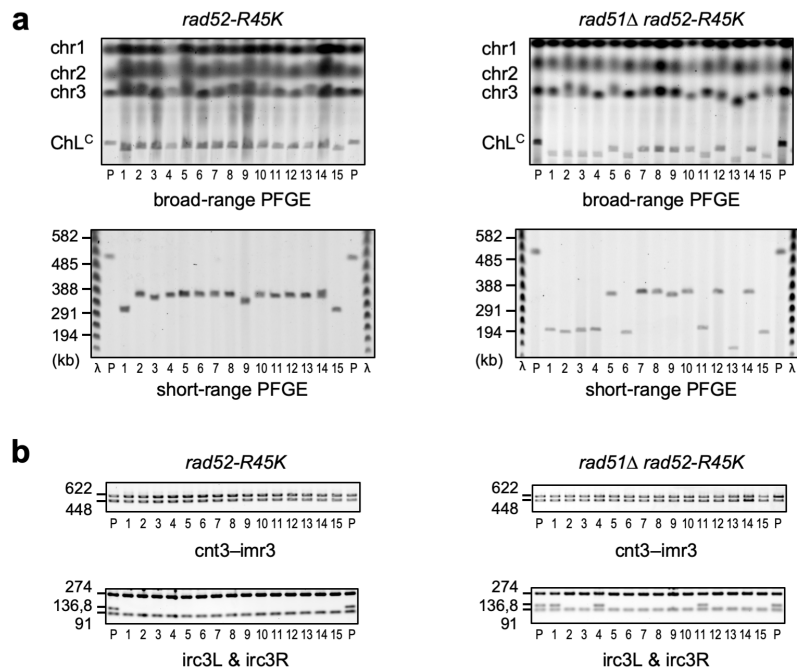

**Supplementary Fig. 2** GCR products formed in the *rad52-R45K* and *rad51Δ rad52-R45K* strains. **a** Chromosomal DNAs from parental and independent GCR clones of the *rad52-R45K* and *rad51Δ rad52-R45K* strains (TNF6599 and 6616, respectively) were separated by broad- and short-range PFGE and stained with EtBr. **b** PCR analysis of GCR products. Both sides of the *cnt3-imr3* junctions (*cnt3-imr3*) and outermost repeats (*irc3L* & *irc3R*) were examined. Uncropped images of the gels presented here are shown in Supplementary Fig. 11

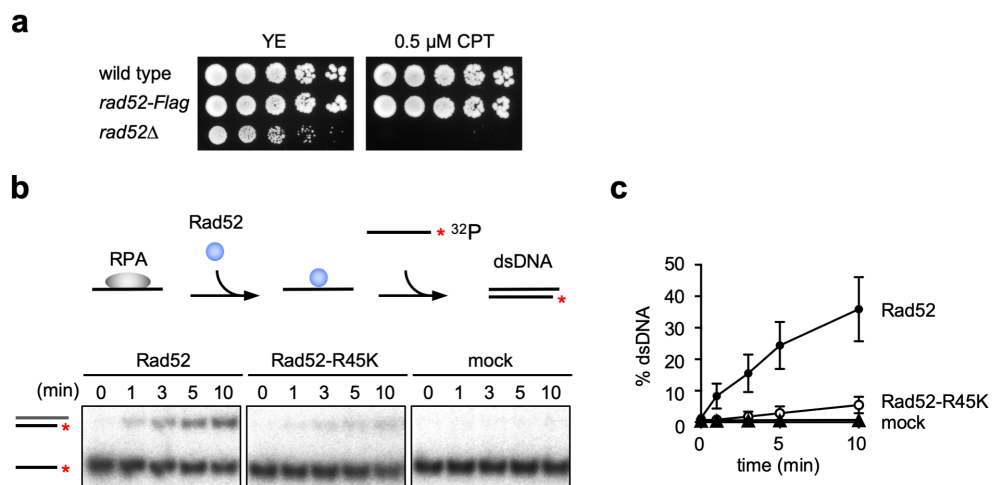

**Supplementary Fig. 3** The *rad52-R45K* mutation impairs the SSA activity in the presence of RPA. **a** Exponentially growing cells of the wild-type, *rad52-Flag*, and *rad52* $\Delta$  strains (TNF35, 2134, and 3696, respectively) were 5-fold serially diluted in water and spotted onto the YE plates supplemented with 0.5  $\mu$ M CPT. **b** SSA assays were performed as in Fig. 4, except that Oligo508 was pre-incubated at 30°C for 5 min in the presence of 0.4 nM RPA. **c** Percentages of dsDNA signals in whole-lane signals. The mean and s.d. of three independent experiments. Uncropped images of the gels presented in **b** are shown in Supplementary Fig. 12. Source data for the graphs in **c** are available in Supplementary Data 1

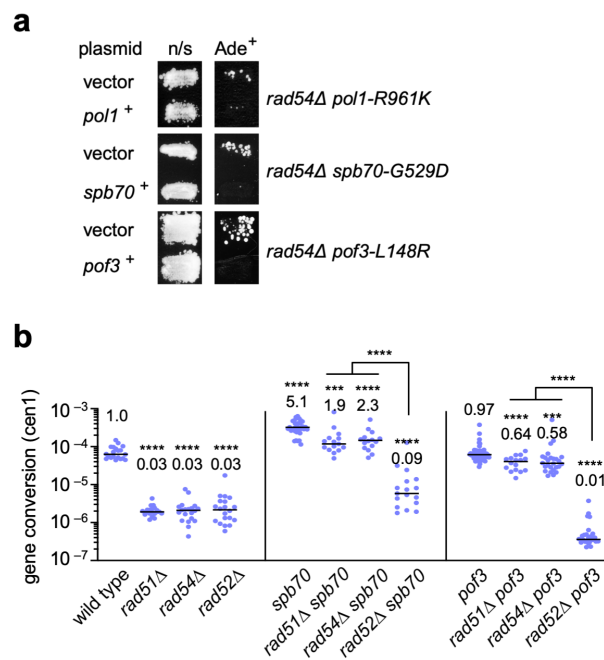

**Supplementary Fig. 4** Mutations in *pol1*, *spb70*, and *pof3* mutations increase Rad51/Rad54-independent but Rad52-dependent recombination at centromeres. **a** Complementation assays. An empty plasmid or a plasmid containing the corresponding wild-type gene was introduced into the *rad54Δ pol1-R961K*, *rad54Δ spb70-G529D*, and *rad54Δ pof3-L148R* strains (TNF4125, 4109, and 4102, respectively). Transformants grown on non-selective EMM+A (n/s) were transferred to EMM+G plates, on which only Ade<sup>+</sup> recombinants can grow. Cells were incubated at 33°C. **b** Gene conversion rates at *cen1* in the wild-type, *rad51Δ*, *rad54Δ*, *rad52Δ*, *spb70-G529D*, *rad51Δ spb70-G529D*, *rad54Δ spb70-G529D*, *rad52Δ spb70-G529D*, *pof3-L148R*, *rad51Δ pof3-L148R*, *rad54Δ pof3-L148R*, and *rad52Δ pof3-L148R* strains (TNF3347, 3446, 3452, 3459, 4174, 4544, 4196, 4609, 4085, 4099, 4119, and 4111, respectively). In contrast to *pol1-R961K* and *pof3-L148R*, the *spb70-G529D* mutation increased gene conversion in the wild-type background. \*\*\*  $P < 0.001$ ; \*\*\*\*  $P < 0.0001$ . Source data for the graphs in **b** are available in Supplementary Data 1

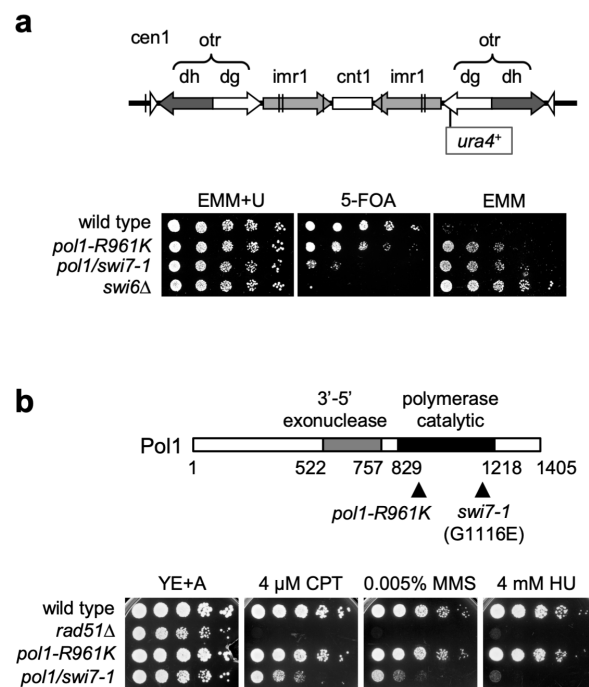

**Supplementary Fig. 5** The *pol1-R916K* mutation partially impairs centromere gene silencing but does not affects sensitivity to DNA damaging agents. **a** Transcriptional silencing of the *ura4<sup>+</sup>* gene integrated at *cen1*. Exponentially growing cells of the wild-type, *pol1-R961K*, *pol1/swi7-1*, and *swi6Δ* (TNF2648, 4208, 4625, and 3220, respectively) in EMM+U were 5-fold serially diluted in water and spotted onto the indicated plates. Cells were grown at 30°C. **b** Exponentially growing cells of the wild-type, *rad51Δ*, *pol1-R961K*, and *pol1/swi7-1* (TNF3347, 3446, 4235, and 4328, respectively) in YE3S were 5-fold serially diluted and spotted onto YE+A supplemented with the indicated concentrations CPT, MMS, or HU. Positions of *pol1-R961K* and *pol1/swi7-1* mutation sites in Pol1 are indicated on the top of panels

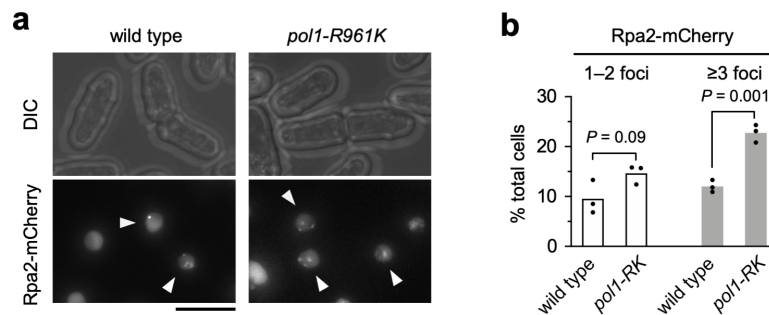

**Supplementary Fig. 6** Spontaneous focus formation of Rpa2-mCherry. Focus formation of mCherry-tagged Rpa2, a subunit of the RPA complex that binds ssDNA. Rpa2-mCherry was expressed under the native *rpa2* promoter at the original chromosomal locus. **a** Exponentially growing cells in EMM at 30°C were collected and observed using a DeltaVision Personal fluorescence microscopy system (GE Healthcare Life Science). Scale bar indicates 5  $\mu\text{m}$ . DIC, differential interference contrast. Arrow heads indicate nuclei containing Rpa2-mCherry foci. **b** Percentages of cells containing 1–2 and  $\geq 3$  Rpa2-mCherry foci in the wild-type and *po1-R961K* strains (TNF5492 and 5511, respectively). Over 400 cells were analysed in each measurement. Bars represent the mean of three independent experiments (dots). Statistical analysis was performed by two-tailed Student's *t*-test. Source data for the graphs in **b** are available in Supplementary Data 1

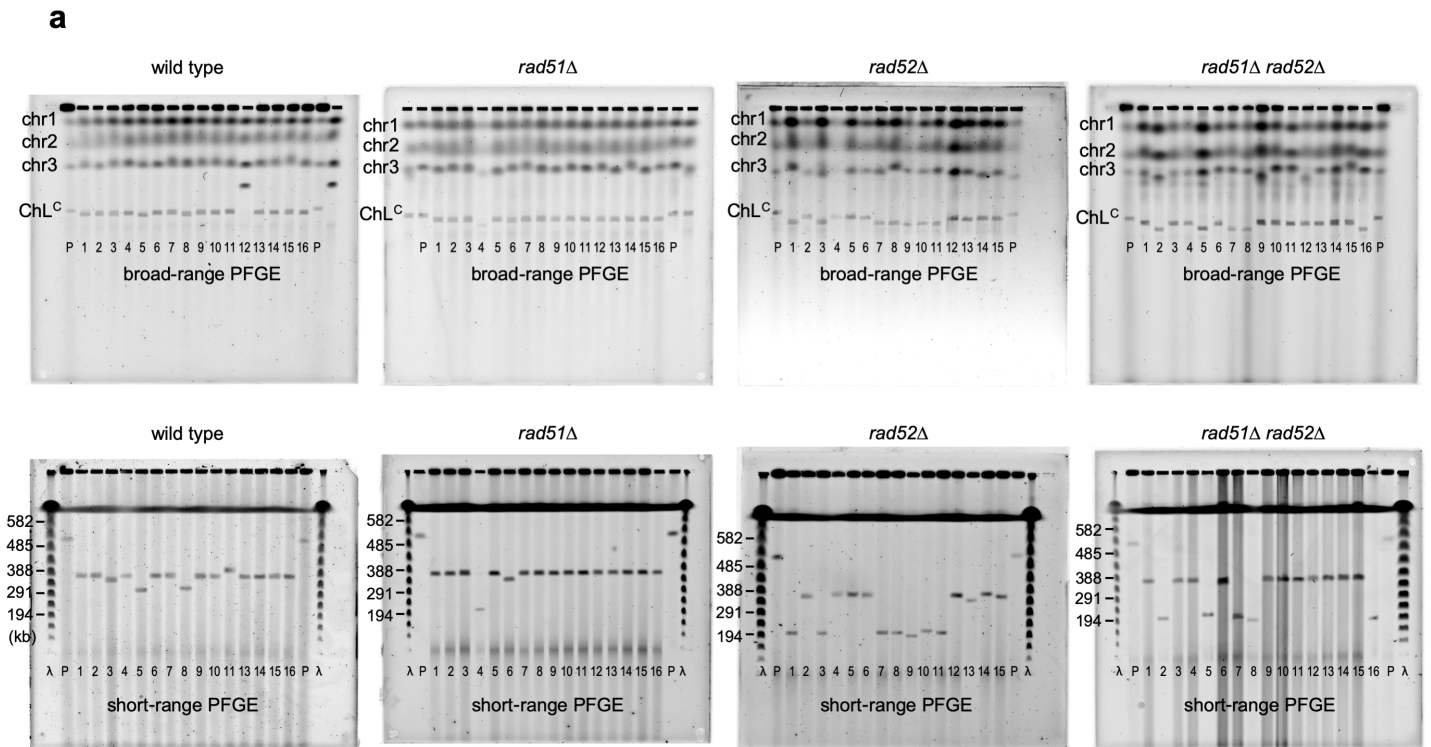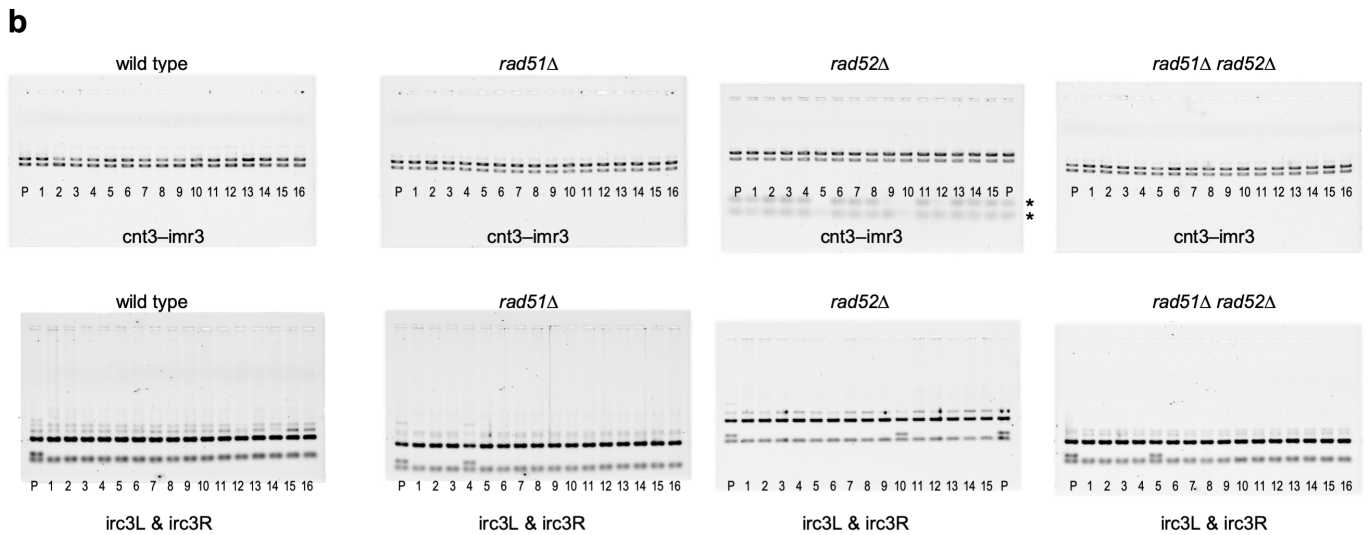

**Supplementary Fig. 7** Uncropped images of the gels presented in Figs. 2b and 2c. **a** PFGE images. **b** Standard agarose gel images. Asterisks indicate DNA bands that have been loaded onto the gel previously

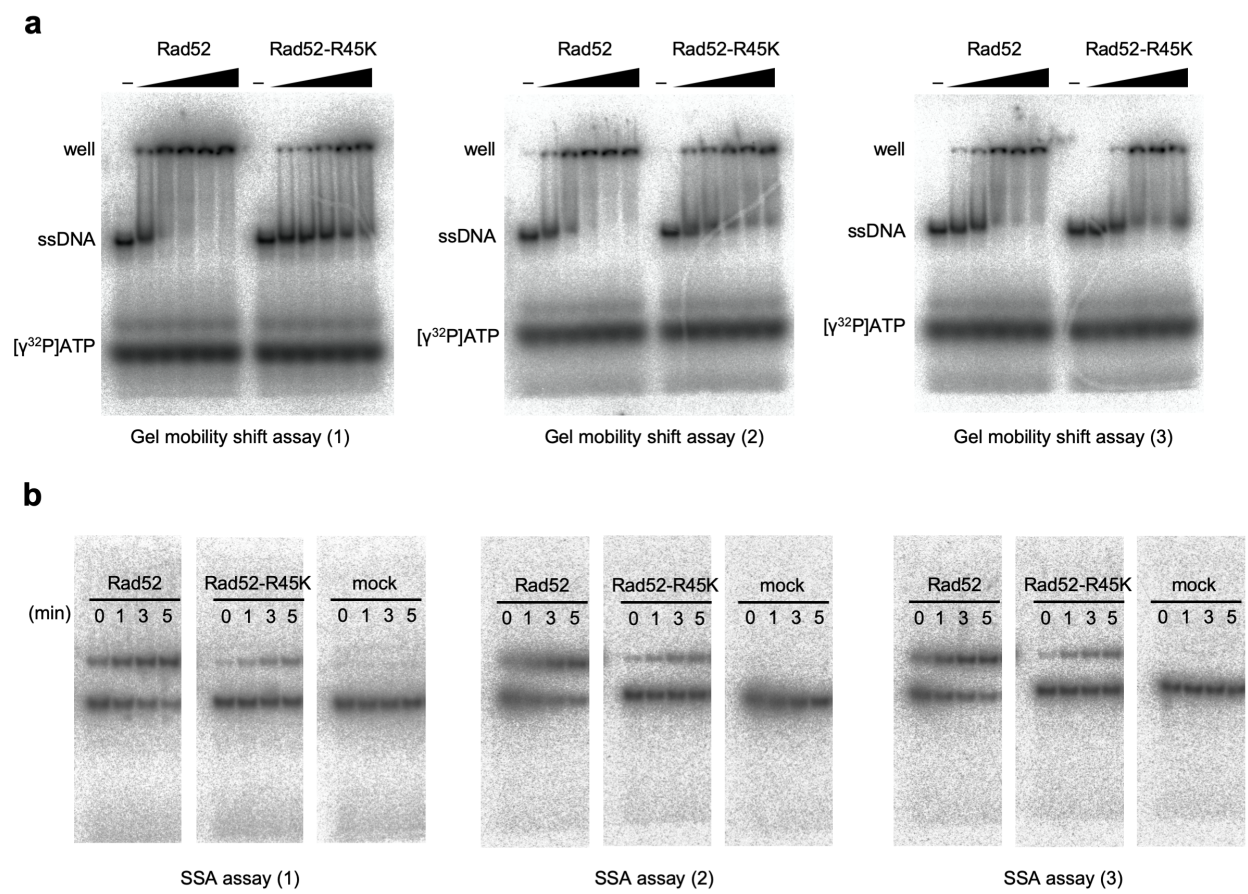

**Supplementary Fig. 8** Uncropped images of the gels presented in Figs. 4b and 4e. **a** Gel mobility shift assays. **b** SSA assays



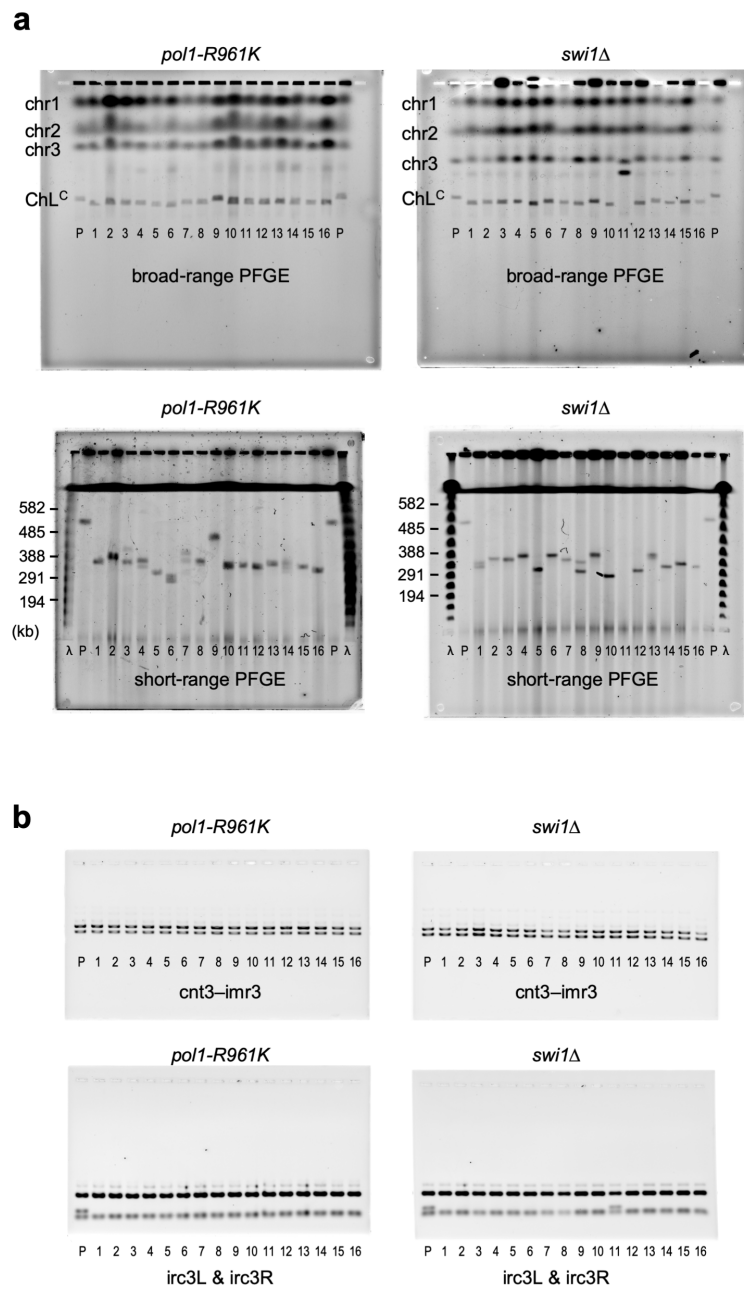

**Supplementary Fig. 9** Uncropped images of gels presented in Figs. 7c and 7d. **a** PFGE images. **b** Standard agarose gel images

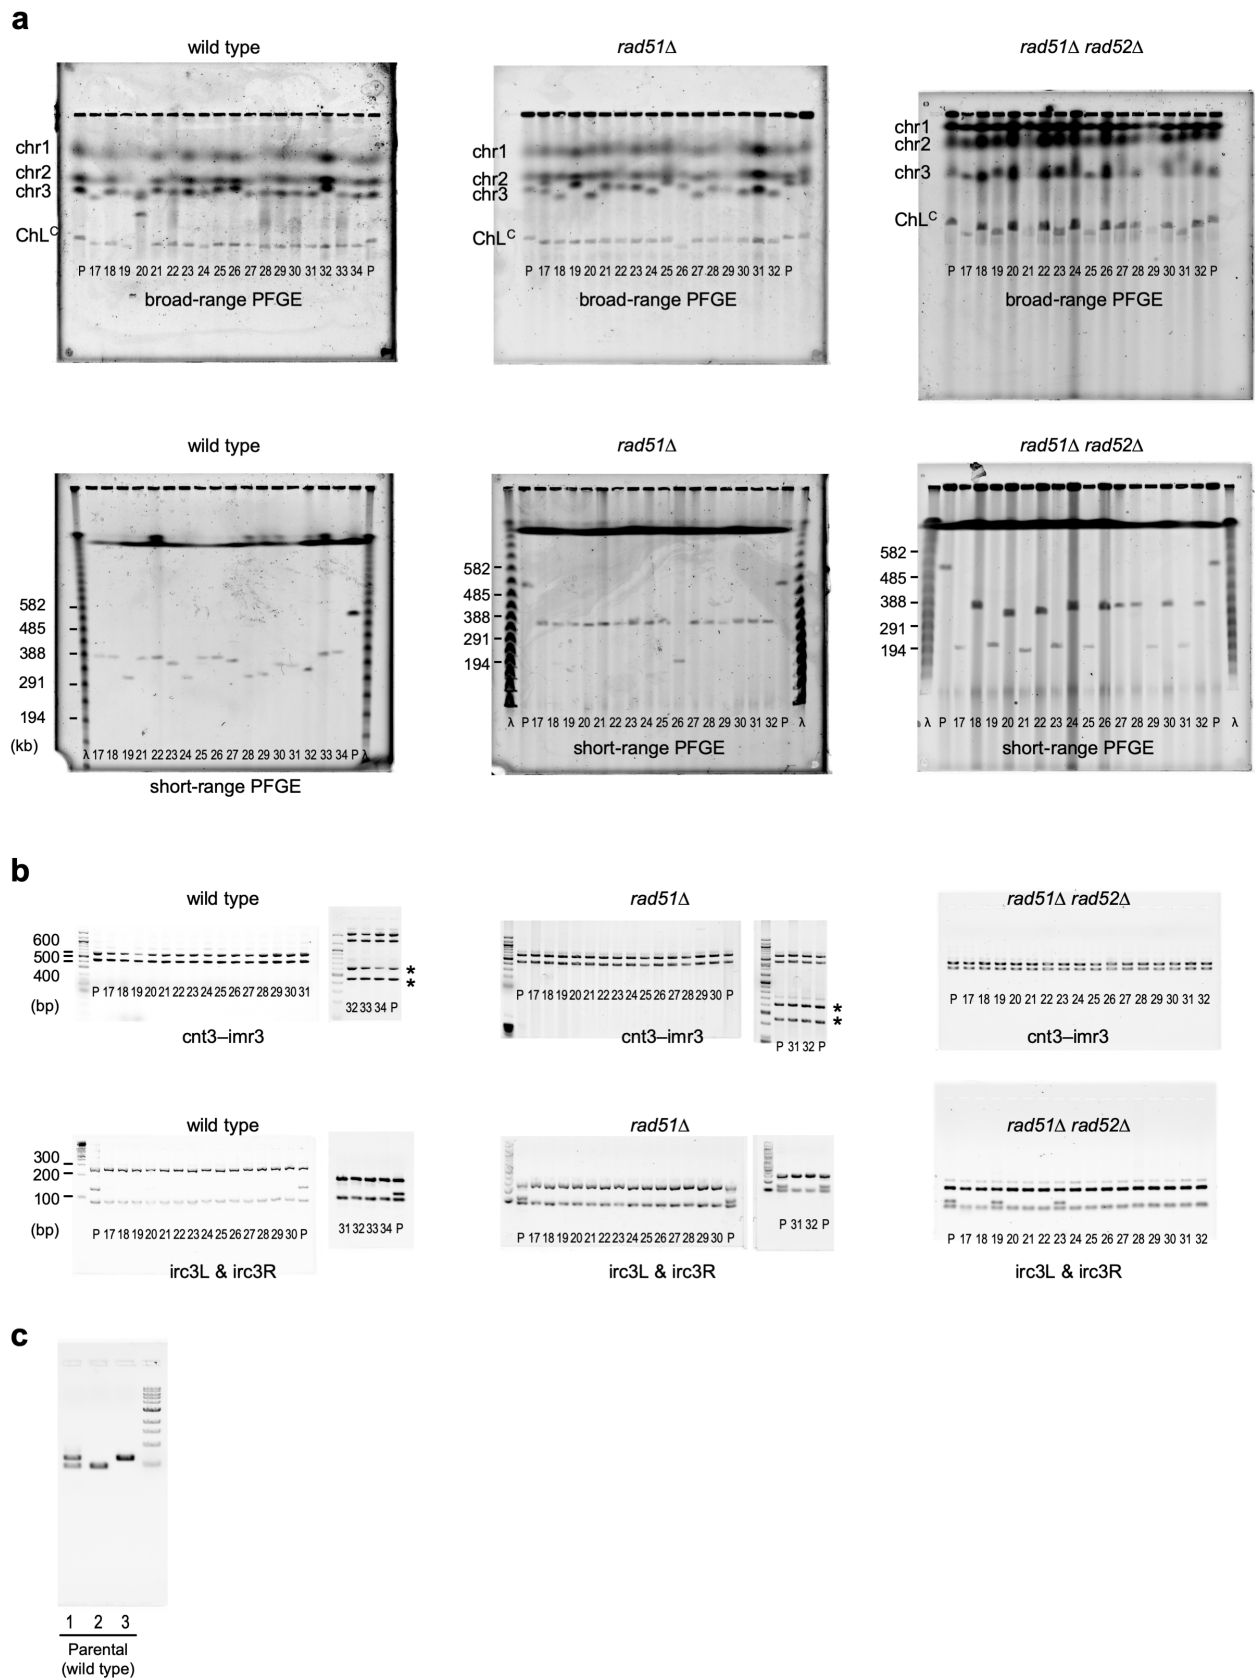

**Supplementary Fig. 10** Uncropped images of the gels presented in Supplementary Fig. 1. **a** PFGE images. **b** and **c** Standard agarose gel images. Asterisks indicate DNA bands that have been loaded onto the gel previously

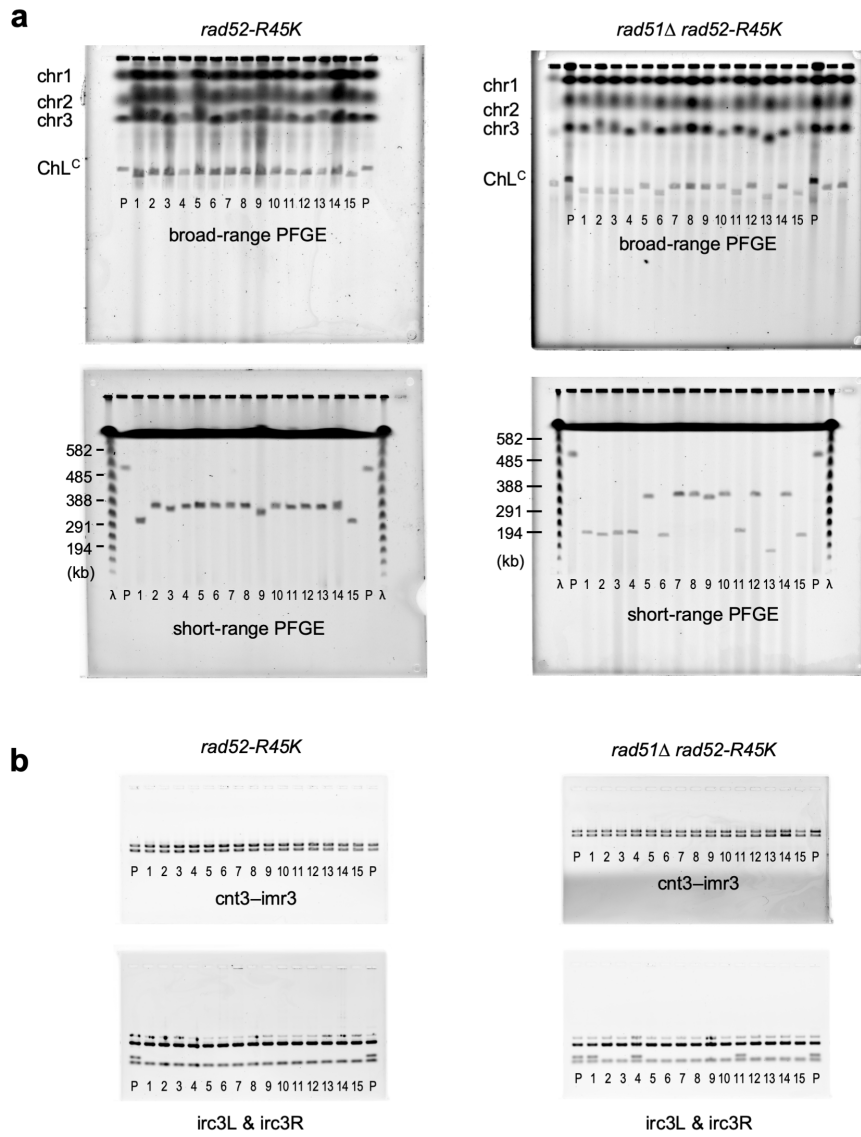

**Supplementary Fig. 11** Uncropped images of the gels presented in Supplementary Fig. 2. **a** PFGE images. **b** Standard agarose gel images

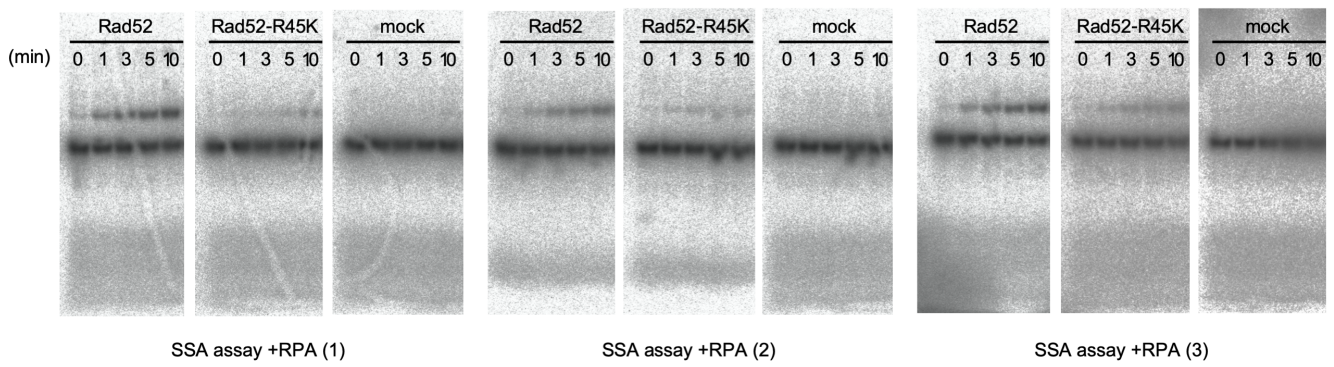

**Supplementary Fig. 12** Uncropped images of the gels presented in Supplementary Fig. 3b

## Supplementary Tables

**Supplementary Table 1.** The yeast strains used in this study.

| Strain  | Genotype                                                                                                                                                                              |
|---------|---------------------------------------------------------------------------------------------------------------------------------------------------------------------------------------|
| TNF5369 | <i>h<sup>-</sup>, smt0, ade6Δ-D, ura4-D18, leu1-32, ChL<sup>C</sup> [ubc11::LEU2<sup>+</sup>, cwf20::ura4<sup>+</sup>, ade6<sup>+</sup>]</i>                                          |
| TNF5411 | <i>h<sup>-</sup>, smt0, ade6Δ-D, ura4-D18, leu1-32, ChL<sup>C</sup> [ubc11::LEU2<sup>+</sup>, cwf20::ura4<sup>+</sup>, ade6<sup>+</sup>], rad51::natMX6</i>                           |
| TNF7493 | <i>h<sup>-</sup>, smt0, ade6Δ-D, ura4-D18, leu1-32, ChL<sup>C</sup> [ubc11::LEU2<sup>+</sup>, cwf20::ura4<sup>+</sup>, ade6<sup>+</sup>], rad52::kanMX6</i>                           |
| TNF7553 | <i>h<sup>-</sup>, smt0, ade6Δ-D, ura4-D18, leu1-32, ChL<sup>C</sup> [ubc11::LEU2<sup>+</sup>, cwf20::ura4<sup>+</sup>, ade6<sup>+</sup>], rad51::natMX6, rad52::kanMX6</i>            |
| TNF6599 | <i>h<sup>-</sup>, smt0, ade6Δ-D, ura4-D18, leu1-32, ChL<sup>C</sup> [ubc11::LEU2<sup>+</sup>, cwf20::ura4<sup>+</sup>, ade6<sup>+</sup>], rad52-R45K</i>                              |
| TNF6707 | <i>h<sup>-</sup>, smt0, ade6Δ-D, ura4-D18, leu1-32, ChL<sup>C</sup> [ubc11::LEU2<sup>+</sup>, cwf20::ura4<sup>+</sup>, ade6<sup>+</sup>], rti1::hphMX6</i>                            |
| TNF7879 | <i>h<sup>-</sup>, smt0, ade6Δ-D, ura4-D18, leu1-32, ChL<sup>C</sup> [ubc11::LEU2<sup>+</sup>, cwf20::ura4<sup>+</sup>, ade6<sup>+</sup>], rad52-R45K, rti1::hphMX6</i>                |
| TNF6616 | <i>h<sup>-</sup>, smt0, ade6Δ-D, ura4-D18, leu1-32, ChL<sup>C</sup> [ubc11::LEU2<sup>+</sup>, cwf20::ura4<sup>+</sup>, ade6<sup>+</sup>], rad51::natMX6, rad52-R45K</i>               |
| TNF6725 | <i>h<sup>-</sup>, smt0, ade6Δ-D, ura4-D18, leu1-32, ChL<sup>C</sup> [ubc11::LEU2<sup>+</sup>, cwf20::ura4<sup>+</sup>, ade6<sup>+</sup>], rad51::natMX6, rti1::hphMX6</i>             |
| TNF7886 | <i>h<sup>-</sup>, smt0, ade6Δ-D, ura4-D18, leu1-32, ChL<sup>C</sup> [ubc11::LEU2<sup>+</sup>, cwf20::ura4<sup>+</sup>, ade6<sup>+</sup>], rad51::natMX6, rad52-R45K, rti1::hphMX6</i> |
| TNF6618 | <i>h<sup>-</sup>, smt0, ade6Δ-D, ura4-D18, leu1-32, ChL<sup>C</sup> [ubc11::LEU2<sup>+</sup>, cwf20::ura4<sup>+</sup>, ade6<sup>+</sup>], msh2::hphMX6</i>                            |
| TNF6867 | <i>h<sup>-</sup>, smt0, ade6Δ-D, ura4-D18, leu1-32, ChL<sup>C</sup> [ubc11::LEU2<sup>+</sup>, cwf20::ura4<sup>+</sup>, ade6<sup>+</sup>], msh3::hphMX6</i>                            |
| TNF6869 | <i>h<sup>-</sup>, smt0, ade6Δ-D, ura4-D18, leu1-32, ChL<sup>C</sup> [ubc11::LEU2<sup>+</sup>, cwf20::ura4<sup>+</sup>, ade6<sup>+</sup>], msh6::hphMX6</i>                            |
| TNF6620 | <i>h<sup>-</sup>, smt0, ade6Δ-D, ura4-D18, leu1-32, ChL<sup>C</sup> [ubc11::LEU2<sup>+</sup>, cwf20::ura4<sup>+</sup>, ade6<sup>+</sup>], mlh1::hphMX6</i>                            |
| TNF6627 | <i>h<sup>-</sup>, smt0, ade6Δ-D, ura4-D18, leu1-32, ChL<sup>C</sup> [ubc11::LEU2<sup>+</sup>, cwf20::ura4<sup>+</sup>, ade6<sup>+</sup>], rad52-R45K, msh2::hphMX6</i>                |
| TNF6649 | <i>h<sup>-</sup>, smt0, ade6Δ-D, ura4-D18, leu1-32, ChL<sup>C</sup> [ubc11::LEU2<sup>+</sup>, cwf20::ura4<sup>+</sup>, ade6<sup>+</sup>], rad51::natMX6, msh2::hphMX6</i>             |
| TNF7081 | <i>h<sup>-</sup>, smt0, ade6Δ-D, ura4-D18, leu1-32, ChL<sup>C</sup> [ubc11::LEU2<sup>+</sup>, cwf20::ura4<sup>+</sup>, ade6<sup>+</sup>], rad51::natMX6, msh3::hphMX6</i>             |
| TNF6908 | <i>h<sup>-</sup>, smt0, ade6Δ-D, ura4-D18, leu1-32, ChL<sup>C</sup> [ubc11::LEU2<sup>+</sup>, cwf20::ura4<sup>+</sup>, ade6<sup>+</sup>], rad51::natMX6, msh6::hphMX6</i>             |

TNF6651 *h<sup>-</sup>, smt0, ade6Δ-D, ura4-D18, leu1-32, ChL<sup>C</sup> [ubc11::LEU2<sup>+</sup>, cwf20::ura4<sup>+</sup>, ade6<sup>+</sup>], rad51::natMX6, mlh1::hphMX6*

TNF6697 *h<sup>-</sup>, smt0, ade6Δ-D, ura4-D18, leu1-32, ChL<sup>C</sup> [ubc11::LEU2<sup>+</sup>, cwf20::ura4<sup>+</sup>, ade6<sup>+</sup>], rad51::natMX6, rad52-R45K, msh2::hphMX6*

TNF5669 *h<sup>-</sup>, smt0, ade6Δ-D, ura4-D18, leu1-32, ChLC [ubc11::LEU2<sup>+</sup>, cwf20::ura4<sup>+</sup>, ade6<sup>+</sup>], mus81::hphMX6*

TNF6614 *h<sup>-</sup>, smt0, ade6Δ-D, ura4-D18, leu1-32, ChLC [ubc11::LEU2<sup>+</sup>, cwf20::ura4<sup>+</sup>, ade6<sup>+</sup>], rad52-R45K, mus81::hphMX6*

TNF5974 *h<sup>-</sup>, smt0, ade6Δ-D, ura4-D18, leu1-32, ChLC [ubc11::LEU2<sup>+</sup>, cwf20::ura4<sup>+</sup>, ade6<sup>+</sup>], rad51::natMX6, mus81::hphMX6*

TNF6648 *h<sup>-</sup>, smt0, ade6Δ-D, ura4-D18, leu1-32, ChLC [ubc11::LEU2<sup>+</sup>, cwf20::ura4<sup>+</sup>, ade6<sup>+</sup>], rad51::natMX6, rad52-R45K, mus81::hphMX6*

TNF6678 *h<sup>-</sup>, smt0, ade6Δ-D, ura4-D18, leu1-32, ChL<sup>C</sup> [ubc11::LEU2<sup>+</sup>, cwf20::ura4<sup>+</sup>, ade6<sup>+</sup>], pol1-R961K*

TNF6952 *h<sup>-</sup>, smt0, ade6Δ-D, ura4-D18, leu1-32, ChL<sup>C</sup> [ubc11::LEU2<sup>+</sup>, cwf20::ura4<sup>+</sup>, ade6<sup>+</sup>], swi1::hphMX6*

TNF6833 *h<sup>-</sup>, smt0, ade6Δ-D, ura4-D18, leu1-32, ChL<sup>C</sup> [ubc11::LEU2<sup>+</sup>, cwf20::ura4<sup>+</sup>, ade6<sup>+</sup>], rad51::natMX6, pol1-R961K*

TNF7909 *h<sup>-</sup>, smt0, ade6Δ-D, ura4-D18, leu1-32, ChL<sup>C</sup> [ubc11::LEU2<sup>+</sup>, cwf20::ura4<sup>+</sup>, ade6<sup>+</sup>], rad51::natMX6, swi1::hphMX6*

TNF6695 *h<sup>-</sup>, smt0, ade6Δ-D, ura4-D18, leu1-32, ChL<sup>C</sup> [ubc11::LEU2<sup>+</sup>, cwf20::ura4<sup>+</sup>, ade6<sup>+</sup>], rad52-R45K, pol1-R961K*

TNF6954 *h<sup>-</sup>, smt0, ade6Δ-D, ura4-D18, leu1-32, ChL<sup>C</sup> [ubc11::LEU2<sup>+</sup>, cwf20::ura4<sup>+</sup>, ade6<sup>+</sup>], rad52-R45K, swi1::hphMX6*

TNF3631 *h<sup>+</sup>, ade6Δ-D, ura4::ade6B(R)-cen1(Sn-Sn)-ade6X(L)*

TNF3635 *h<sup>+</sup>, ade6Δ-D, ura4::ade6B(R)-cen1(Sn-Sn)-ade6X(L), rad51::kanMX6*

TNF5995 *h<sup>+</sup>, ade6Δ-D, ura4::ade6B(R)-cen1(Sn-Sn)-ade6X(L), rad52-R45K*

TNF5389 *h<sup>+</sup>, ade6Δ-D, ura4::ade6B(R)-cen1(Sn-Sn)-ade6X(L), rti1::hphMX6*

TNF7878 *h<sup>+</sup>, ade6Δ-D, ura4::ade6B(R)-cen1(Sn-Sn)-ade6X(L), rad52-R45K, rti1::hphMX6*

TNF6021 *h<sup>+</sup>, ade6Δ-D, ura4::ade6B(R)-cen1(Sn-Sn)-ade6X(L), rad51::kanMX6, rad52-R45K*

TNF5427 *h<sup>+</sup>, ade6Δ-D, ura4::ade6B(R)-cen1(Sn-Sn)-ade6X(L), rad51::kanMX6, rti1::hphMX6*

TNF7890 *h<sup>+</sup>, ade6Δ-D, ura4::ade6B(R)-cen1(Sn-Sn)-ade6X(L), rad51::kanMX6, rad52-R45K, rti1::hphMX6*

TNF3643 *h<sup>+</sup>, ade6Δ-D, ura4::ade6B(R)-cen1(Sn-Sn)-ade6X(L), rad52::kanMX6*

TNF6128 *h<sup>+</sup>, ade6Δ-D, ura4::ade6B(R)-cen1(Sn-Sn)-ade6X(L), msh2::hphMX6*

TNF6518 *h<sup>+</sup>, ade6Δ-D, ura4::ade6B(R)-cen1(Sn-Sn)-ade6X(L), mus81::hphMX6*

TNF6136 *h<sup>+</sup>, ade6Δ-D, ura4::ade6B(R)-cen1(Sn-Sn)-ade6X(L), rad51::kanMX6, msh2::hphMX6*

TNF6569 *h<sup>+</sup>, ade6Δ-D, ura4::ade6B(R)-cen1(Sn-Sn)-ade6X(L), rad51::kanMX6, mus81::hphMX6*

TNF3645 *h<sup>+</sup>, ade6Δ-D, ura4::ade6B(R)-cen1(Sn-Sn)-ade6X(L), rad54::kanMX6*

TNF3643 *h<sup>+</sup>, ade6Δ-D, ura4::ade6B(R)-cen1(Sn-Sn)-ade6X(L), rad52::kanMX6*

TNF4215 *h<sup>+</sup>, ade6Δ-D, ura4::ade6B(R)-cen1(Sn-Sn)-ade6X(L), pol1-R961K*

TNF4371 *h<sup>+</sup>, ade6Δ-D, ura4::ade6B(R)-cen1(Sn-Sn)-ade6X(L), rad51::kanMX6, pol1-R961K*

TNF4378 *h<sup>+</sup>, ade6Δ-D, ura4::ade6B(R)-cen1(Sn-Sn)-ade6X(L), rad54::kanMX6, pol1-R961K*

TNF4350 *h<sup>+</sup>, ade6Δ-D, ura4::ade6B(R)-cen1(Sn-Sn)-ade6X(L), rad52::kanMX6, pol1-R961K*

TNF3347 *h<sup>+</sup>, ade6Δ-D, imr1L(Sn:ade6B), imr1R(Sn:ade6X)*

TNF3446 *h<sup>+</sup>, ade6Δ-D, imr1L(Sn:ade6B), imr1R(Sn:ade6X), rad51::kanMX6*

TNF3452 *h<sup>+</sup>, ade6Δ-D, imr1L(Sn:ade6B), imr1R(Sn:ade6X), rad54::kanMX6*

TNF3459 *h<sup>+</sup>, ade6Δ-D, imr1L(Sn:ade6B), imr1R(Sn:ade6X), rad52::kanMX6*

TNF4235 *h<sup>+</sup>, ade6Δ-D, imr1L(Sn:ade6B), imr1R(Sn:ade6X), pol1-R961K*

TNF4300 *h<sup>+</sup>, ade6Δ-D, imr1L(Sn:ade6B), imr1R(Sn:ade6X), rad51::kanMX6, pol1-R961K*

TNF4252 *h<sup>+</sup>, ade6Δ-D, imr1L(Sn:ade6B), imr1R(Sn:ade6X), rad54::kanMX6, pol1-R961K*

TNF4253 *h<sup>+</sup>, ade6Δ-D, imr1L(Sn:ade6B), imr1R(Sn:ade6X), rad52::kanMX6, pol1-R961K*

TNF4174 *h<sup>+</sup>, ade6Δ-D, imr1L(Sn:ade6B), imr1R(Sn:ade6X), spb70-G529D*

TNF4544 *h<sup>+</sup>, ade6Δ-D, imr1L(Sn:ade6B), imr1R(Sn:ade6X), rad51::kanMX6, spb70-G529D*

TNF4196 *h<sup>+</sup>, ade6Δ-D, imr1L(Sn:ade6B), imr1R(Sn:ade6X), rad54::kanMX6, spb70-G529D*

TNF4609 *h<sup>+</sup>, ade6Δ-D, imr1L(Sn:ade6B), imr1R(Sn:ade6X), rad52::kanMX6, spb70-G529D*

TNF4085 *h<sup>+</sup>, ade6Δ-D, imr1L(Sn:ade6B), imr1R(Sn:ade6X), pof3-L148R*

TNF4099 *h<sup>+</sup>, ade6Δ-D, imr1L(Sn:ade6B), imr1R(Sn:ade6X), rad51::kanMX6, pof3-L148R*

TNF4119 *h<sup>+</sup>, ade6Δ-D, imr1L(Sn:ade6B), imr1R(Sn:ade6X), rad54::kanMX6, pof3-L148R*

TNF4111 *h<sup>+</sup>, ade6Δ-D, imr1L(Sn:ade6B), imr1R(Sn:ade6X), rad52::kanMX6, pof3-L148R*

TNF5999 *h<sup>+</sup>, ade6Δ-D, imr1L(Sn:ade6B), imr1R(Sn:ade6X), rad52-R45K*

TNF6019 *h<sup>+</sup>, ade6Δ-D, imr1L(Sn:ade6B), imr1R(Sn:ade6X), rad51::kanMX6, rad52-R45K*

TNF6009 *h<sup>+</sup>, ade6Δ-D, imr1L(Sn:ade6B), imr1R(Sn:ade6X), rad52-R45K, pol1-R961K*

TNF6037 *h<sup>+</sup>, ade6Δ-D, imr1L(Sn:ade6B), imr1R(Sn:ade6X), rad51::kanMX6, rad52-R45K, pol1-R961K*

TNF3710 *h<sup>+</sup>, ade6Δ-D, imr1L(Sn:ade6B), imr1R(Sn:ade6X), swi6::hphMX6*

TNF4542 *h<sup>+</sup>, ade6Δ-D, imr1L(Sn:ade6B), imr1R(Sn:ade6X), rad51::kanMX6, swi6::hphMX6*

TNF6655 *h<sup>+</sup>, ade6Δ-D, imr1L(Sn:ade6B), imr1R(Sn:ade6X), rad52::kanMX6, swi6::hphMX6*

TNF5096 *h<sup>+</sup>, ade6Δ-D, imr1L(Sn:ade6B), imr1R(Sn:ade6X), cdc18-K46*

TNF5155 *h<sup>+</sup>, ade6Δ-D, imr1L(Sn:ade6B), imr1R(Sn:ade6X), rad51::kanMX6, cdc18-K46*

TNF6632 *h<sup>+</sup>, ade6Δ-D, imr1L(Sn:ade6B), imr1R(Sn:ade6X), rad52::kanMX6, cdc18-K46*

TNF4594 *h<sup>+</sup>, ade6Δ-D, imr1L(Sn:ade6B), imr1R(Sn:ade6X), cdc20-M10*

TNF4617 *h<sup>+</sup>, ade6Δ-D, imr1L(Sn:ade6B), imr1R(Sn:ade6X), rad51::kanMX6, cdc20-M10*

TNF5037 *h<sup>+</sup>, ade6Δ-D, imr1L(Sn:ade6B), imr1R(Sn:ade6X), rad52::kanMX6, cdc20-M10*

TNF5018 *h<sup>+</sup>, ade6Δ-D, imr1L(Sn:ade6B), imr1R(Sn:ade6X), swi1::hphMX6*

TNF5033 *h<sup>+</sup>, ade6Δ-D, imr1L(Sn:ade6B), imr1R(Sn:ade6X), rad51::kanMX6, swi1::hphMX6*

TNF6653 *h<sup>+</sup>, ade6Δ-D, imr1L(Sn:ade6B), imr1R(Sn:ade6X), rad52::kanMX6, swi1::hphMX6*

TNF4328 *h<sup>+</sup>, ade6Δ-D, imr1L(Sn:ade6B), imr1R(Sn:ade6X), swi7-1*

TNF3983 *h<sup>-</sup>, smt0, leu1-32, ade6Δ-D, imr1L(Sn:ade6B), imr1R(Sn:ade6X), rad54::kanMX6*

TNF4125 *h<sup>-</sup>, smt0, leu1-32, ade6Δ-D, imr1L(Sn:ade6B), imr1R(Sn:ade6X), rad54::kanMX6, pol1-R961K*

TNF4109 *h<sup>-</sup>, smt0, leu1-32, ade6Δ-D, imr1L(Sn:ade6B), imr1R(Sn:ade6X), rad54::kanMX6, spb70-G529D*

TNF4102 *h<sup>-</sup>, smt0, leu1-32, ade6Δ-D, imr1L(Sn:ade6B), imr1R(Sn:ade6X), rad54::kanMX6, pof3-L148R*

TNF2648 *h<sup>+</sup>, ura4-DS/E, otr1R(SphI)-ura4<sup>+</sup>*

TNF4208 *h<sup>+</sup>, ura4-DS/E, otr1R(SphI)-ura4<sup>+</sup>, pol1-R961K*

TNF4625 *h<sup>+</sup>, ura4-DS/E, otr1R(SphI)-ura4<sup>+</sup>, swi7-1*

TNF3220 *h<sup>+</sup>, ura4-DS/E, otr1R(SphI)-ura4<sup>+</sup>, swi6::hphMX6*

TNF35 *h<sup>+</sup>*

TNF2134 *h<sup>+</sup>, rad52-6His3Flag:kanMX6*

TNF3696 *h<sup>+</sup>, rad52::kanMX6*

TNF5492 *h<sup>+</sup>, rpa2-mCherry:hphMX6*

TNF5511 *h<sup>+</sup>, rpa2-mCherry:hphMX6, pol1-R961K*

---



**Supplementary Table 2.** DNA primers used in this study.

| Primer     | Sequence                         |
|------------|----------------------------------|
| cn1        | 5'–AACCGCAACAAACGATTAGC–3'       |
| cn2        | 5'–CGGAATTAGAAAGATTGATGATTTG–3'  |
| im1        | 5'–AAGTTTTGATGCTCAACAAATGGC–3'   |
| rc1        | 5'–CATTAAAAATCAACAAGTCTTGTCC–3'  |
| rc2        | 5'–GTTACTATGGATAAAGATAATTGTTT–3' |
| rad52-N-F1 | 5'–CGCAAAGCAGATTGCAAAGG–3'       |
| rad52-RK-R | 5'–GGACCTGACTTTCTTGAAACG–3'      |
| rad52-RK-F | 5'–CGTTTCAAGAAAGTCAGGTCC–3'      |
| rad52-C-R  | 5'–CCTCTGCTACTGCTAAATGAGC–3'     |
